# Supplementary material for: Simple preparation of Cu6Sn5/Sn composites as anode materials for lithium-ion batteries
Source: Royal Society of Chemistry journal article supplement (doi:10.1039/c5ra23788b), 2016-01-01
Supplement: c5ra23788b1.pdf [file c5ra23788b1.pdf]

**Electronic Supplementary Information (ESI) for**  
**Simple preparation of Cu<sub>6</sub>Sn<sub>5</sub>/Sn composites as anode materials for**  
**lithium-ion batteries**

QiGang Han<sup>a, b\*</sup>, Zheng Yi<sup>a, b</sup>, Yong Cheng<sup>b</sup>, Yaoming Wu<sup>b</sup>, LiMin Wang<sup>b\*</sup>

*a College of Materials Science and Engineering, Jilin University, Changchun 130025, China*

*b State Key Laboratory of Rare Earth Resource Utilization, Changchun Institute of Applied Chemistry, CAS, Changchun 130022, China.*

**Corresponding author:**

E-mail address: hanqg@jlu.edu.cn (Q. Han).

E-mail address: lmwang@ciac.ac.cn (L. Wang).

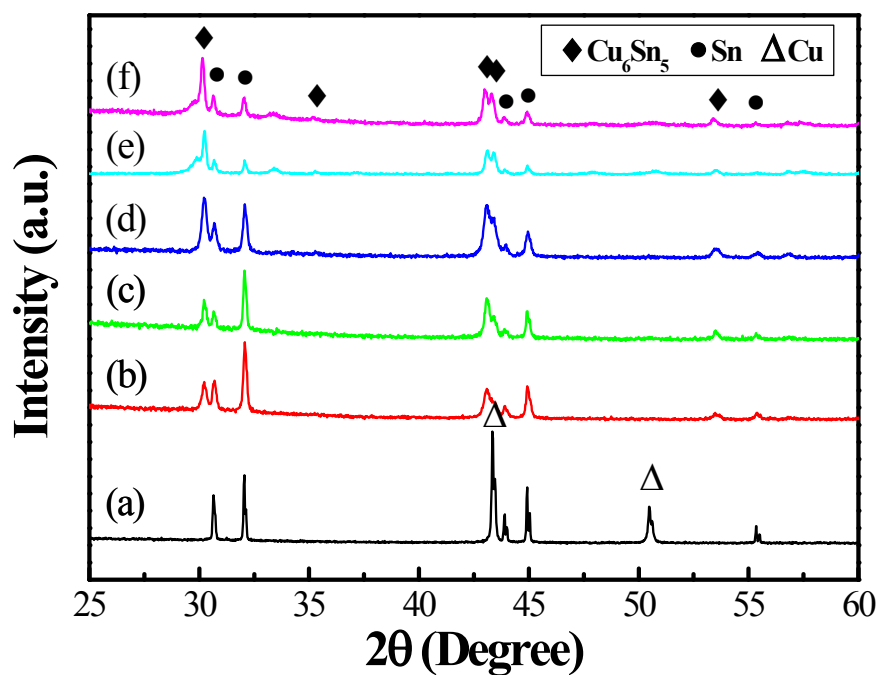

Fig. S1. XRD patterns of the sample with  $y = 7$  prepared in different ball-milling times (a) before ball milling, (b) 50 min, (c) 100 min, (d) 200 min, (e) 400 min and (f) 600 min.

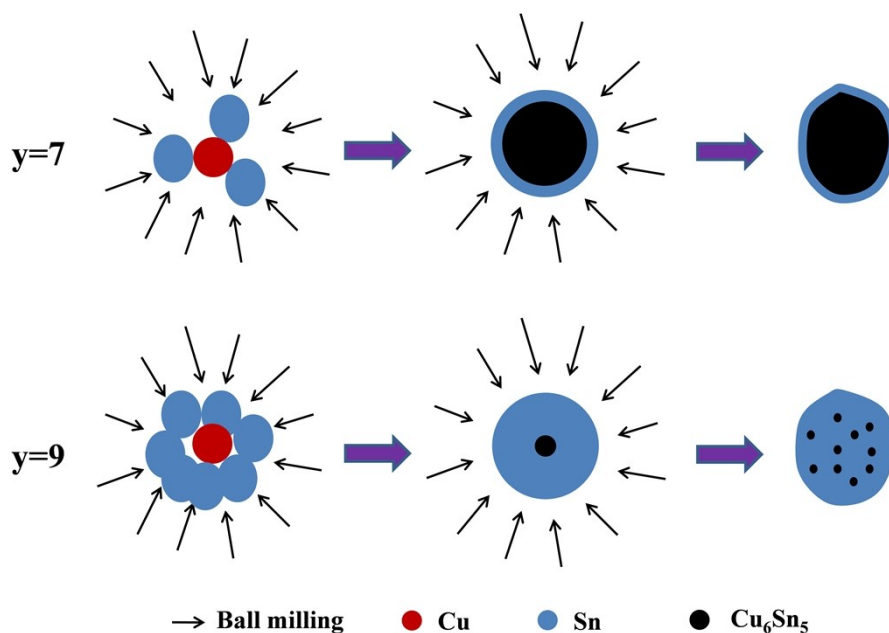

Fig. S2. The formation process of the core-shell structure of the samples with  $y=7$  and  $y=9$ .

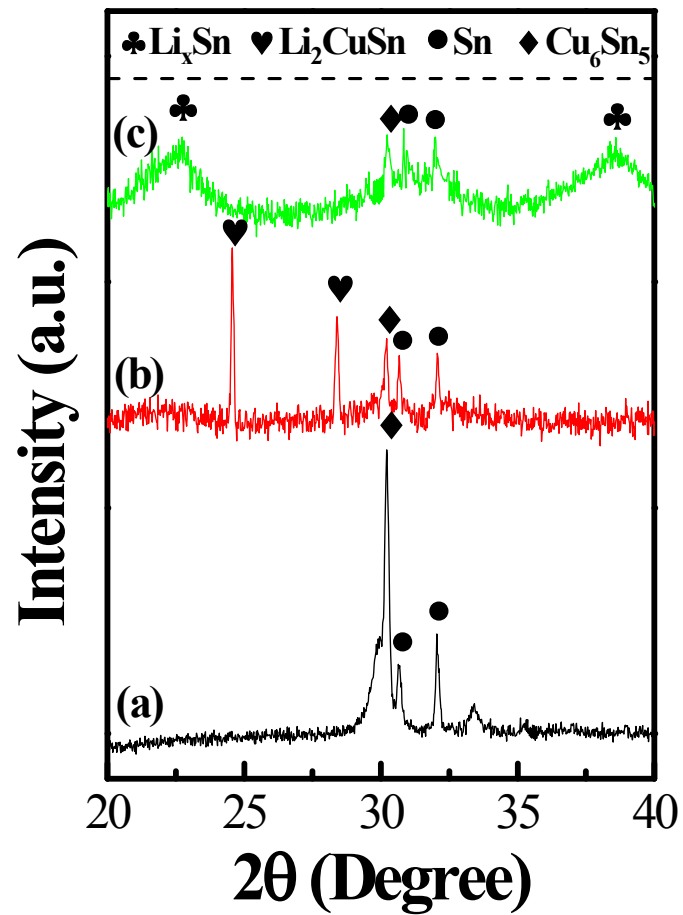

Fig. S3. XRD patterns of the sample with  $y=7$  anode before and after discharge to different voltage vs.  $\text{Li}^+/\text{Li}$ , (a) before discharge, (b) after discharge to 0.4 V, and (c) after discharge to 0.01 V.

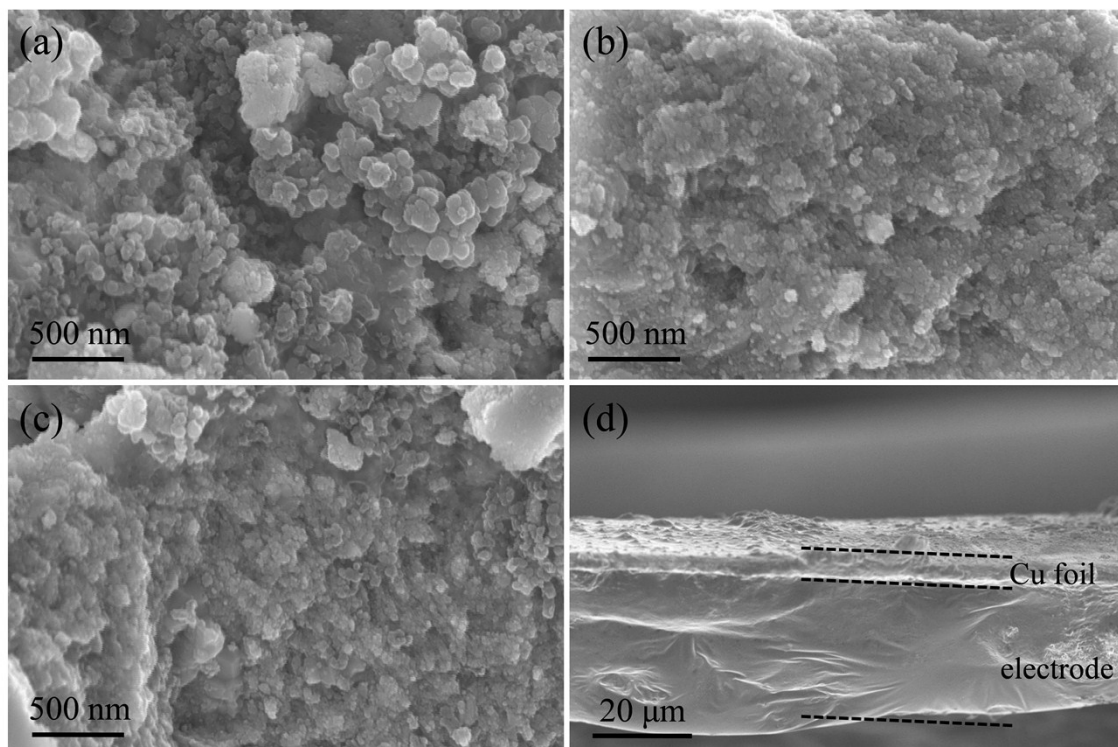

Fig. S4. SEM images of the  $\text{Cu}_x\text{Sn}_y$  anodes, (a)  $y=9$ , (b)  $y=7$ , and (c)  $y=4.5$ ; (d) SEM image of the cross profile of the anode with  $y=7$ .
